# Supplementary material for: Integrative genomics analysis identifies promising SNPs and genes implicated in tuberculosis risk based on multiple omics datasets
Source: PubMed Central journal article supplement (PMC7732298; doi:10.18632/aging.103744), 2020-10-13
Supplement: aging-12-103744-s008..pdf [file aging-12-103744-s008..pdf]

## SUPPLEMENTARY TABLES

**Supplementary Table 7. Significant pathways enriched by tuberculosis-associated genes (Gene set #2) identified from Sherlock Bayesian analysis of dataset #4 in the replication stage.**

| Pathway ID    | Database     | Input number | Background number | P-Value  | FDR      |
|---------------|--------------|--------------|-------------------|----------|----------|
| R-HSA-1430728 | Reactome     | 28           | 2075              | 4.09E-07 | 1.19E-04 |
| R-HSA-168256  | Reactome     | 28           | 2096              | 4.98E-07 | 1.33E-04 |
| R-HSA-1643685 | Reactome     | 19           | 1049              | 5.30E-07 | 1.33E-04 |
| R-HSA-392499  | Reactome     | 26           | 2012              | 2.37E-06 | 3.72E-04 |
| hsa01100      | KEGG PATHWAY | 21           | 1433              | 3.61E-06 | 5.05E-04 |
| R-HSA-162582  | Reactome     | 30           | 2689              | 6.93E-06 | 8.72E-04 |
| R-HSA-597592  | Reactome     | 20           | 1412              | 1.01E-05 | 1.09E-03 |
| R-HSA-2470946 | Reactome     | 3            | 10                | 2.53E-05 | 2.39E-03 |
| R-HSA-68884   | Reactome     | 3            | 14                | 5.94E-05 | 4.87E-03 |
| R-HSA-71387   | Reactome     | 8            | 288               | 6.82E-05 | 5.47E-03 |
| R-HSA-168249  | Reactome     | 15           | 1043              | 1.12E-04 | 6.97E-03 |
| R-HSA-211945  | Reactome     | 5            | 105               | 1.51E-04 | 8.92E-03 |
| R-HSA-199991  | Reactome     | 11           | 631               | 1.89E-04 | 1.10E-02 |
| R-HSA-8953854 | Reactome     | 11           | 667               | 3.00E-04 | 1.66E-02 |
| R-HSA-5653656 | Reactome     | 11           | 669               | 3.07E-04 | 1.68E-02 |
| R-HSA-77075   | Reactome     | 3            | 27                | 3.39E-04 | 1.80E-02 |
| R-HSA-167160  | Reactome     | 3            | 27                | 3.39E-04 | 1.80E-02 |
| R-HSA-72086   | Reactome     | 3            | 29                | 4.12E-04 | 1.90E-02 |
| R-HSA-74160   | Reactome     | 17           | 1448              | 4.17E-04 | 1.90E-02 |
| R-HSA-73857   | Reactome     | 16           | 1316              | 4.24E-04 | 1.90E-02 |
| R-HSA-167172  | Reactome     | 4            | 73                | 4.27E-04 | 1.90E-02 |
| R-HSA-6807505 | Reactome     | 4            | 74                | 4.49E-04 | 1.96E-02 |
| hsa00030      | KEGG PATHWAY | 3            | 30                | 4.51E-04 | 1.96E-02 |
| R-HSA-397014  | Reactome     | 6            | 209               | 4.70E-04 | 1.97E-02 |
| R-HSA-382551  | Reactome     | 11           | 720               | 5.61E-04 | 2.19E-02 |
| R-HSA-446203  | Reactome     | 7            | 304               | 5.81E-04 | 2.22E-02 |
| R-HSA-5649702 | Reactome     | 2            | 7                 | 7.19E-04 | 2.42E-02 |
| R-HSA-167287  | Reactome     | 3            | 36                | 7.41E-04 | 2.45E-02 |
| R-HSA-167290  | Reactome     | 3            | 36                | 7.41E-04 | 2.45E-02 |
| R-HSA-8983711 | Reactome     | 2            | 9                 | 1.09E-03 | 3.27E-02 |
| R-HSA-15869   | Reactome     | 4            | 95                | 1.10E-03 | 3.27E-02 |
| R-HSA-5362517 | Reactome     | 3            | 43                | 1.20E-03 | 3.55E-02 |
| R-HSA-5685939 | Reactome     | 2            | 10                | 1.31E-03 | 3.73E-02 |
| R-HSA-212436  | Reactome     | 14           | 1193              | 1.33E-03 | 3.79E-02 |
| R-HSA-5668914 | Reactome     | 4            | 103               | 1.47E-03 | 4.06E-02 |
| R-HSA-2468052 | Reactome     | 2            | 11                | 1.54E-03 | 4.24E-02 |
| R-HSA-167152  | Reactome     | 3            | 48                | 1.62E-03 | 4.37E-02 |
| R-HSA-6785807 | Reactome     | 4            | 108               | 1.73E-03 | 4.64E-02 |
| R-HSA-6798695 | Reactome     | 8            | 478               | 1.80E-03 | 4.72E-02 |
| R-HSA-5696398 | Reactome     | 4            | 111               | 1.91E-03 | 4.90E-02 |

**Note:** Proportion of risk genes: these identified risk genes (Input number) accounted for the proportion of all genes in each pathway (Background number) enriched by these genes. FDR values were calculated by using the method of Benjamini-Hochberg false discovery rate (FDR) correction.

**Supplementary Table 8. Significant GO-terms enriched by tuberculosis-associated genes (Gene set #2) identified from Sherlock Bayesian analysis of dataset #4 in the replication stage.**

| <b>GO-terms ID</b> | <b>Input number</b> | <b>Background number</b> | <b>P-Value</b> | <b>FDR</b> |
|--------------------|---------------------|--------------------------|----------------|------------|
| GO:0043229         | 33                  | 1863                     | 4.63E-11       | 8.74E-08   |
| GO:0005488         | 31                  | 2247                     | 5.75E-08       | 4.34E-05   |
| GO:0097159         | 18                  | 845                      | 1.07E-07       | 5.78E-05   |
| GO:0032555         | 11                  | 292                      | 1.69E-07       | 7.08E-05   |
| GO:0009987         | 34                  | 2852                     | 3.69E-07       | 1.16E-04   |
| GO:0005737         | 24                  | 1641                     | 7.34E-07       | 1.63E-04   |
| GO:0043227         | 27                  | 2030                     | 8.76E-07       | 1.74E-04   |
| GO:0005622         | 28                  | 2228                     | 1.61E-06       | 2.89E-04   |
| GO:0043168         | 12                  | 454                      | 1.76E-06       | 2.89E-04   |
| GO:0019222         | 18                  | 1070                     | 2.92E-06       | 4.24E-04   |
| GO:0097708         | 9                   | 261                      | 4.54E-06       | 5.91E-04   |
| GO:0005829         | 12                  | 531                      | 8.30E-06       | 9.79E-04   |
| GO:0003824         | 18                  | 1162                     | 8.82E-06       | 9.79E-04   |
| GO:0032553         | 9                   | 292                      | 1.08E-05       | 1.11E-03   |
| GO:0031982         | 13                  | 667                      | 1.62E-05       | 1.57E-03   |
| GO:0043226         | 24                  | 2086                     | 3.77E-05       | 3.39E-03   |
| GO:0005515         | 21                  | 1688                     | 3.96E-05       | 3.39E-03   |
| GO:0010468         | 15                  | 1012                     | 8.07E-05       | 6.08E-03   |
| GO:0005654         | 10                  | 474                      | 8.21E-05       | 6.08E-03   |
| GO:1901265         | 9                   | 388                      | 9.28E-05       | 6.61E-03   |
| GO:0003723         | 6                   | 155                      | 9.91E-05       | 6.80E-03   |
| GO:0008152         | 26                  | 2527                     | 1.09E-04       | 6.97E-03   |
| GO:0000794         | 3                   | 18                       | 1.15E-04       | 6.97E-03   |
| GO:1901363         | 13                  | 813                      | 1.16E-04       | 6.97E-03   |
| GO:0030054         | 6                   | 177                      | 1.99E-04       | 1.12E-02   |
| GO:0036094         | 9                   | 467                      | 3.55E-04       | 1.83E-02   |
| GO:0051173         | 9                   | 469                      | 3.66E-04       | 1.83E-02   |
| GO:1903708         | 3                   | 28                       | 3.74E-04       | 1.83E-02   |
| GO:0005634         | 15                  | 1182                     | 4.14E-04       | 1.90E-02   |
| GO:0006266         | 2                   | 5                        | 4.22E-04       | 1.90E-02   |
| GO:0044237         | 21                  | 2027                     | 4.64E-04       | 1.97E-02   |
| GO:0046914         | 6                   | 215                      | 5.43E-04       | 2.19E-02   |
| GO:1990904         | 4                   | 79                       | 5.68E-04       | 2.19E-02   |
| GO:0060089         | 6                   | 217                      | 5.69E-04       | 2.19E-02   |
| GO:0043902         | 4                   | 80                       | 5.94E-04       | 2.22E-02   |
| GO:0036211         | 12                  | 857                      | 6.76E-04       | 2.42E-02   |
| GO:0048037         | 4                   | 84                       | 7.08E-04       | 2.42E-02   |
| GO:0016818         | 6                   | 227                      | 7.16E-04       | 2.42E-02   |
| GO:0110165         | 26                  | 2864                     | 7.18E-04       | 2.42E-02   |
| GO:0042629         | 2                   | 7                        | 7.19E-04       | 2.42E-02   |
| GO:0001649         | 3                   | 38                       | 8.59E-04       | 2.79E-02   |
| GO:0070942         | 2                   | 8                        | 8.95E-04       | 2.84E-02   |
| GO:0031331         | 4                   | 92                       | 9.80E-04       | 3.06E-02   |
| GO:0016486         | 2                   | 9                        | 1.09E-03       | 3.27E-02   |
| GO:0009262         | 2                   | 9                        | 1.09E-03       | 3.27E-02   |
| GO:2000108         | 2                   | 10                       | 1.31E-03       | 3.73E-02   |
| GO:0010976         | 3                   | 48                       | 1.62E-03       | 4.37E-02   |

|            |   |     |          |          |
|------------|---|-----|----------|----------|
| GO:0019320 | 2 | 12  | 1.79E-03 | 4.72E-02 |
| GO:0016787 | 9 | 593 | 1.83E-03 | 4.74E-02 |
| GO:0000166 | 7 | 377 | 1.95E-03 | 4.95E-02 |

**Note:** Proportion of risk genes: these identified risk genes (Input number) accounted for the proportion of all genes in each pathway (Background number) enriched by these genes. FDR values were calculated by using the method of Benjamini-Hochberg false discovery rate (FDR) correction.

**Supplementary Table 9. Significant KEGG and NHGRI GWAS catalog disease enriched by tuberculosis-associated genes (Gene set #2) identified from Sherlock Bayesian analysis of dataset #4 in the replication stage.**

| Disease terms                        | Database           | Input number | Background number | P-Value  | FDR      |
|--------------------------------------|--------------------|--------------|-------------------|----------|----------|
| QT interval                          | NHGRI GWAS Catalog | 6            | 37                | 4.28E-08 | 4.34E-05 |
| Obesity-related traits               | NHGRI GWAS Catalog | 16           | 691               | 1.89E-07 | 7.11E-05 |
| Ulcerative colitis                   | NHGRI GWAS Catalog | 6            | 138               | 5.35E-05 | 4.48E-03 |
| Congenital disorders of metabolism   | KEGG DISEASE       | 12           | 695               | 1.06E-04 | 6.97E-03 |
| Hematological and biochemical traits | NHGRI GWAS Catalog | 3            | 31                | 4.93E-04 | 2.05E-02 |
| Skin and soft tissue diseases        | KEGG DISEASE       | 4            | 103               | 1.47E-03 | 4.06E-02 |
| Skin diseases                        | KEGG DISEASE       | 4            | 103               | 1.47E-03 | 4.06E-02 |

**Note:** Proportion of risk genes: these identified risk genes (Input number) accounted for the proportion of all genes in each pathway (Background number) enriched by these genes. FDR values were calculated by using the method of Benjamini-Hochberg false discovery rate (FDR) correction.

**Supplementary Table 10. Significant pathways enriched by tuberculosis-associated genes (Gene set #3) identified from Sherlock Bayesian analysis of dataset #5 in the replication stage.**

| Pathway ID    | Database     | Input number | Background number | P-Value  | FDR      |
|---------------|--------------|--------------|-------------------|----------|----------|
| R-HSA-1430728 | Reactome     | 35           | 2075              | 2.43E-08 | 3.16E-05 |
| R-HSA-392499  | Reactome     | 33           | 2012              | 1.18E-07 | 5.19E-05 |
| R-HSA-74160   | Reactome     | 26           | 1448              | 5.42E-07 | 1.24E-04 |
| R-HSA-212436  | Reactome     | 22           | 1193              | 2.73E-06 | 4.24E-04 |
| R-HSA-597592  | Reactome     | 23           | 1412              | 1.17E-05 | 1.34E-03 |
| R-HSA-73857   | Reactome     | 22           | 1316              | 1.23E-05 | 1.37E-03 |
| R-HSA-72649   | Reactome     | 5            | 58                | 3.22E-05 | 3.21E-03 |
| R-HSA-72702   | Reactome     | 5            | 58                | 3.22E-05 | 3.21E-03 |
| R-HSA-72662   | Reactome     | 5            | 59                | 3.48E-05 | 3.32E-03 |
| hsa05168      | KEGG PATHWAY | 12           | 492               | 4.15E-05 | 3.76E-03 |
| R-HSA-72695   | Reactome     | 4            | 51                | 2.88E-04 | 1.67E-02 |
| R-HSA-72766   | Reactome     | 8            | 291               | 3.67E-04 | 2.07E-02 |
| R-HSA-9006934 | Reactome     | 10           | 458               | 4.22E-04 | 2.28E-02 |
| R-HSA-156827  | Reactome     | 5            | 111               | 5.74E-04 | 2.79E-02 |
| R-HSA-72706   | Reactome     | 5            | 112               | 5.97E-04 | 2.87E-02 |
| R-HSA-5653656 | Reactome     | 12           | 669               | 6.51E-04 | 3.09E-02 |
| R-HSA-499943  | Reactome     | 3            | 28                | 7.46E-04 | 3.34E-02 |
| R-HSA-72737   | Reactome     | 5            | 119               | 7.76E-04 | 3.39E-02 |
| R-HSA-72613   | Reactome     | 5            | 119               | 7.76E-04 | 3.39E-02 |
| R-HSA-1614517 | Reactome     | 2            | 6                 | 8.98E-04 | 3.55E-02 |
| R-HSA-196807  | Reactome     | 3            | 31                | 9.81E-04 | 3.76E-02 |
| R-HSA-168273  | Reactome     | 5            | 131               | 1.17E-03 | 3.98E-02 |
| hsa05133      | KEGG PATHWAY | 4            | 76                | 1.19E-03 | 3.98E-02 |
| R-HSA-382551  | Reactome     | 12           | 720               | 1.21E-03 | 3.98E-02 |
| R-HSA-199991  | Reactome     | 11           | 631               | 1.35E-03 | 4.22E-02 |
| hsa00983      | KEGG PATHWAY | 4            | 79                | 1.37E-03 | 4.22E-02 |
| R-HSA-1643685 | Reactome     | 15           | 1049              | 1.41E-03 | 4.22E-02 |
| R-HSA-168255  | Reactome     | 5            | 141               | 1.61E-03 | 4.56E-02 |
| R-HSA-159763  | Reactome     | 2            | 9                 | 1.74E-03 | 4.78E-02 |

**Note:** Proportion of risk genes: these identified risk genes (Input number) accounted for the proportion of all genes in each pathway (Background number) enriched by these genes. FDR values were calculated by using the method of Benjamini-Hochberg false discovery rate (FDR) correction.

**Supplementary Table 11. Significant GO-terms enriched by tuberculosis-associated genes (Gene set #3) identified from Sherlock Bayesian analysis of dataset #5 in the replication stage.**

| <b>GO-terms ID</b> | <b>Input number</b> | <b>Background number</b> | <b>P-Value</b> | <b>FDR</b> |
|--------------------|---------------------|--------------------------|----------------|------------|
| GO:0005515         | 32                  | 1688                     | 7.25E-09       | 1.41E-05   |
| GO:0110165         | 42                  | 2864                     | 4.32E-08       | 3.36E-05   |
| GO:0019222         | 23                  | 1070                     | 1.23E-07       | 5.19E-05   |
| GO:0043227         | 33                  | 2030                     | 1.44E-07       | 5.19E-05   |
| GO:0005488         | 35                  | 2247                     | 1.60E-07       | 5.19E-05   |
| GO:0005622         | 34                  | 2228                     | 3.86E-07       | 1.07E-04   |
| GO:0000166         | 13                  | 377                      | 5.26E-07       | 1.24E-04   |
| GO:0043229         | 30                  | 1863                     | 6.65E-07       | 1.36E-04   |
| GO:0043231         | 27                  | 1606                     | 1.12E-06       | 2.07E-04   |
| GO:0043167         | 20                  | 962                      | 1.36E-06       | 2.31E-04   |
| GO:0043233         | 16                  | 725                      | 7.63E-06       | 9.91E-04   |
| GO:0030659         | 6                   | 75                       | 7.69E-06       | 9.91E-04   |
| GO:1901363         | 17                  | 813                      | 7.90E-06       | 9.91E-04   |
| GO:0046872         | 15                  | 657                      | 9.96E-06       | 1.17E-03   |
| GO:0005509         | 7                   | 137                      | 2.15E-05       | 2.26E-03   |
| GO:0005576         | 15                  | 736                      | 3.58E-05       | 3.32E-03   |
| GO:0003723         | 7                   | 155                      | 4.56E-05       | 3.95E-03   |
| GO:0005737         | 23                  | 1641                     | 1.11E-04       | 8.80E-03   |
| GO:0010468         | 17                  | 1012                     | 1.13E-04       | 8.80E-03   |
| GO:0032991         | 13                  | 639                      | 1.20E-04       | 8.80E-03   |
| GO:1990904         | 5                   | 79                       | 1.28E-04       | 9.07E-03   |
| GO:0005856         | 9                   | 320                      | 1.35E-04       | 9.23E-03   |
| GO:0005739         | 8                   | 260                      | 1.76E-04       | 1.14E-02   |
| GO:0031982         | 13                  | 667                      | 1.81E-04       | 1.14E-02   |
| GO:0031090         | 11                  | 493                      | 1.84E-04       | 1.14E-02   |
| GO:0008152         | 30                  | 2527                     | 1.91E-04       | 1.14E-02   |
| GO:0032553         | 8                   | 292                      | 3.75E-04       | 2.07E-02   |
| GO:0031967         | 6                   | 165                      | 4.89E-04       | 2.54E-02   |
| GO:1901265         | 9                   | 388                      | 5.34E-04       | 2.70E-02   |
| GO:0005654         | 10                  | 474                      | 5.47E-04       | 2.70E-02   |
| GO:0009295         | 2                   | 5                        | 6.76E-04       | 3.10E-02   |
| GO:0005635         | 4                   | 65                       | 6.85E-04       | 3.10E-02   |
| GO:0031975         | 6                   | 183                      | 8.26E-04       | 3.47E-02   |
| GO:0016787         | 11                  | 593                      | 8.30E-04       | 3.47E-02   |
| GO:0044237         | 24                  | 2027                     | 8.66E-04       | 3.51E-02   |
| GO:0016020         | 19                  | 1443                     | 9.02E-04       | 3.55E-02   |
| GO:0043228         | 11                  | 606                      | 9.85E-04       | 3.76E-02   |
| GO:0071704         | 28                  | 2548                     | 1.01E-03       | 3.78E-02   |
| GO:0032549         | 4                   | 74                       | 1.09E-03       | 3.95E-02   |
| GO:0016229         | 2                   | 7                        | 1.15E-03       | 3.96E-02   |
| GO:0070129         | 2                   | 7                        | 1.15E-03       | 3.96E-02   |
| GO:0005310         | 2                   | 7                        | 1.15E-03       | 3.96E-02   |
| GO:0097367         | 8                   | 351                      | 1.20E-03       | 3.98E-02   |
| GO:0033036         | 9                   | 440                      | 1.26E-03       | 4.10E-02   |
| GO:0005886         | 12                  | 726                      | 1.29E-03       | 4.12E-02   |
| GO:0065003         | 8                   | 358                      | 1.36E-03       | 4.22E-02   |
| GO:0034707         | 2                   | 8                        | 1.43E-03       | 4.22E-02   |

|            |   |     |          |          |
|------------|---|-----|----------|----------|
| GO:0003777 | 2 | 8   | 1.43E-03 | 4.22E-02 |
| GO:0043025 | 4 | 82  | 1.56E-03 | 4.49E-02 |
| GO:0005215 | 6 | 210 | 1.63E-03 | 4.58E-02 |
| GO:0035091 | 3 | 38  | 1.70E-03 | 4.68E-02 |

**Note:** Proportion of risk genes: these identified risk genes (Input number) accounted for the proportion of all genes in each pathway (Background number) enriched by these genes. FDR values were calculated by using the method of Benjamini-Hochberg false discovery rate (FDR) correction.

**Supplementary Table 12. Significant KEGG and NHGRI GWAS catalog disease enriched by tuberculosis-associated genes (Gene set #3) identified from Sherlock Bayesian analysis of dataset #5 in the replication stage.**

| Disease terms                        | Database           | Input number | Background number | P-Value  | FDR      |
|--------------------------------------|--------------------|--------------|-------------------|----------|----------|
| Parkinson's disease                  | NHGRI GWAS Catalog | 6            | 56                | 1.60E-06 | 2.59E-04 |
| Hematological and biochemical traits | NHGRI GWAS Catalog | 4            | 31                | 4.83E-05 | 4.09E-03 |
| Hematologic diseases                 | KEGG DISEASE       | 7            | 181               | 1.16E-04 | 8.80E-03 |
| Congenital disorders of metabolism   | KEGG DISEASE       | 13           | 695               | 2.66E-04 | 1.57E-02 |
| Mean platelet volume                 | NHGRI GWAS Catalog | 4            | 55                | 3.77E-04 | 2.07E-02 |
| Metabolite levels                    | NHGRI GWAS Catalog | 5            | 107               | 4.89E-04 | 2.54E-02 |
| Obesity-related traits               | NHGRI GWAS Catalog | 12           | 691               | 8.56E-04 | 3.51E-02 |
| Cardiovascular diseases              | KEGG DISEASE       | 8            | 342               | 1.02E-03 | 3.79E-02 |
| Serum total protein level            | NHGRI GWAS Catalog | 2            | 8                 | 1.43E-03 | 4.22E-02 |
| Triglycerides                        | NHGRI GWAS Catalog | 4            | 81                | 1.49E-03 | 4.37E-02 |
| QT interval                          | NHGRI GWAS Catalog | 3            | 37                | 1.58E-03 | 4.52E-02 |
| Bone mineral density                 | NHGRI GWAS Catalog | 4            | 85                | 1.77E-03 | 4.81E-02 |
| Nervous system diseases              | KEGG DISEASE       | 13           | 859               | 1.78E-03 | 4.81E-02 |

**Note:** Proportion of risk genes: these identified risk genes (Input number) accounted for the proportion of all genes in each pathway (Background number) enriched by these genes. FDR values were calculated by using the method of Benjamini-Hochberg false discovery rate (FDR) correction.

**Supplementary Table 13. 2 common diseases enriched by tuberculosis-associated genes across 3 gene sets identified from Sherlock analysis.**

| Disease terms                      | Database           | Gene set #1              |          | Gene set #2              |                   | Gene set #3              |                   |
|------------------------------------|--------------------|--------------------------|----------|--------------------------|-------------------|--------------------------|-------------------|
|                                    |                    | Proportion of risk genes | FDR      | Proportion of risk genes | Corrected P-Value | Proportion of risk genes | Corrected P-Value |
| Congenital disorders of metabolism | KEGG DISEASE       | 5.61%                    | 4.96E-12 | 1.73%                    | 6.97E-03          | 1.87%                    | 1.57E-02          |
| Obesity-related traits             | NHGRI GWAS Catalog | 5.07%                    | 1.23E-09 | 2.32%                    | 7.11E-05          | 1.74%                    | 3.51E-02          |

**Note:** Proportion of risk genes: these identified risk genes (Input number) accounted for the proportion of all genes in each pathway (Background number) enriched by these genes. FDR values were calculated by using the method of Benjamini-Hochberg false discovery rate (FDR) correction.
