# Supplementary material for: Integrative genomics analysis identifies promising SNPs and genes implicated in tuberculosis risk based on multiple omics datasets
Source: PubMed Central journal article supplement (PMC7732298; doi:10.18632/aging.103744), 2020-10-13
Supplement: aging-12-103744-s010..pdf [file aging-12-103744-s010..pdf]

## SUPPLEMENTARY TABLES

**Supplementary Table 15. 21 pathways enriched by using MAGMA gene-set analysis based on the KEGG pathway resource.**

| Pathway Name                                 | Gene Number | Beta | MAGMA-based P values | KOBAS-based P values (genes from the discovery stage) |
|----------------------------------------------|-------------|------|----------------------|-------------------------------------------------------|
| Pyruvate metabolism                          | 38          | 0.35 | 4.88E-03             | 5.70E-02                                              |
| Acute myeloid leukemia                       | 53          | 0.28 | 5.67E-03             | 1.03E-02                                              |
| Toxoplasmosis                                | 121         | 0.20 | 6.47E-03             | 6.68E-04                                              |
| Type II diabetes mellitus                    | 44          | 0.30 | 9.75E-03             | 3.13E-03                                              |
| Neurotrophin signaling pathway               | 121         | 0.17 | 9.91E-03             | 8.91E-04                                              |
| RIG-I-like receptor signaling pathway        | 62          | 0.27 | 1.09E-02             | 5.87E-02                                              |
| B cell receptor signaling pathway            | 70          | 0.20 | 1.55E-02             | 4.15E-03                                              |
| Adipocytokine signaling pathway              | 64          | 0.22 | 1.69E-02             | 5.68E-02                                              |
| Natural killer cell mediated cytotoxicity    | 128         | 0.16 | 1.81E-02             | 5.60E-05                                              |
| VEGF signaling pathway                       | 73          | 0.20 | 2.11E-02             | 1.32E-03                                              |
| Insulin signaling pathway                    | 127         | 0.14 | 2.46E-02             | 1.93E-03                                              |
| Toll-like receptor signaling pathway         | 95          | 0.18 | 2.55E-02             | 2.26E-03                                              |
| Jak-STAT signaling pathway                   | 142         | 0.14 | 2.69E-02             | 4.68E-03                                              |
| Drug metabolism - cytochrome P450            | 71          | 0.23 | 2.70E-02             | 4.98E-05                                              |
| mTOR signaling pathway                       | 45          | 0.21 | 3.08E-02             | 8.13E-04                                              |
| Prostate cancer                              | 85          | 0.16 | 3.42E-02             | 3.44E-02                                              |
| Pancreatic cancer                            | 66          | 0.16 | 4.16E-02             | 6.88E-02                                              |
| Hepatitis C                                  | 128         | 0.12 | 4.62E-02             | 1.87E-04                                              |
| Metabolism of xenobiotics by cytochrome P450 | 71          | 0.20 | 4.74E-02             | 4.90E-04                                              |

**Supplementary Table 16. The proportion of multiple layers of evidence in constructed GGI network using the GeneMANIA tool.**

| ID | Evidence of interactions | Proportions |
|----|--------------------------|-------------|
| 1  | Co-expression links      | 71.52%      |
| 2  | Predicted links          | 19.09%      |
| 3  | Physical interactions    | 8.44%       |
| 4  | Pathways                 | 0.39%       |
| 5  | Genetic interactions     | 0.31%       |
| 6  | Shared protein domains   | 0.23%       |
| 7  | Co-localization          | 0.02%       |

**Supplementary Table 17. Differential expression analysis of 26 candidate genes between infected cells and uninfected cells based on the GSE133803 data.**

| Gene           | GSM3927531<br>(infected cells) | GSM3927532<br>(infected cells) | GSM3927533<br>(infected cells) | GSM3927534<br>(uninfected cells) | GSM3927535<br>(uninfected cells) | GSM3927536<br>(uninfected cells) | P values (t-test) |
|----------------|--------------------------------|--------------------------------|--------------------------------|----------------------------------|----------------------------------|----------------------------------|-------------------|
| <i>RPS23</i>   | 9.91                           | 9.69                           | 9.47                           | 12.03                            | 12.05                            | 12.02                            | 5.45E-05          |
| <i>RPS5</i>    | 11.52                          | 11.14                          | 11.08                          | 13.08                            | 13.16                            | 13.02                            | 2.11E-04          |
| <i>CLN8</i>    | 6.74                           | 6.85                           | 6.77                           | 7.78                             | 7.78                             | 7.76                             | 8.18E-06          |
| <i>SPATA20</i> | 10.15                          | 9.77                           | 9.63                           | 10.97                            | 11.02                            | 10.95                            | 1.98E-03          |
| <i>CDC16</i>   | 11.36                          | 11.11                          | 11.05                          | 12.33                            | 12.45                            | 12.22                            | 5.63E-04          |
| <i>TMEM99</i>  | 9.40                           | 9.42                           | 9.09                           | 10.31                            | 10.37                            | 10.11                            | 2.00E-03          |
| <i>LIG3</i>    | 7.90                           | 7.65                           | 7.67                           | 8.51                             | 8.49                             | 8.35                             | 1.86E-03          |
| <i>RRM1</i>    | 10.49                          | 10.24                          | 10.00                          | 11.13                            | 11.16                            | 11.12                            | 3.24E-03          |
| <i>SCAPER</i>  | 8.10                           | 8.04                           | 7.96                           | 8.44                             | 8.41                             | 8.45                             | 8.84E-04          |
| <i>ZNF266</i>  | 6.78                           | 6.76                           | 6.74                           | 6.77                             | 7.17                             | 7.24                             | 0.110             |
| <i>RCN3</i>    | 11.07                          | 10.79                          | 10.91                          | 11.37                            | 11.51                            | 11.31                            | 8.73E-03          |
| <i>CARD9</i>   | 7.13                           | 7.39                           | 7.09                           | 7.55                             | 7.44                             | 7.43                             | 5.48E-02          |
| <i>TBRG4</i>   | 8.66                           | 8.24                           | 8.44                           | 8.74                             | 8.77                             | 8.63                             | 0.111             |
| <i>ZNF502</i>  | 7.62                           | 7.67                           | 7.30                           | 7.84                             | 7.75                             | 7.68                             | 0.143             |
| <i>ZNF197</i>  | 6.96                           | 7.05                           | 6.91                           | 7.06                             | 7.25                             | 7.18                             | 5.40E-02          |
| <i>NUDT13</i>  | 7.06                           | 6.77                           | 6.96                           | 7.03                             | 7.27                             | 6.96                             | 0.281             |
| <i>HDAC10</i>  | 7.14                           | 6.78                           | 6.88                           | 7.05                             | 7.06                             | 6.98                             | 0.424             |
| <i>TDRKH</i>   | 6.91                           | 6.69                           | 6.77                           | 6.64                             | 6.77                             | 6.89                             | 0.833             |
| <i>PDK1</i>    | 7.24                           | 7.13                           | 7.04                           | 7.13                             | 7.26                             | 6.95                             | 0.825             |
| <i>CDK10</i>   | 6.77                           | 6.74                           | 6.59                           | 6.68                             | 6.59                             | 6.68                             | 0.494             |
| <i>DHX57</i>   | 6.70                           | 6.81                           | 6.69                           | 6.64                             | 6.80                             | 6.59                             | 0.475             |
| <i>NPHP4</i>   | 8.00                           | 7.78                           | 7.86                           | 7.87                             | 7.82                             | 7.62                             | 0.318             |
| <i>ZNF354A</i> | 7.29                           | 7.26                           | 7.49                           | 7.24                             | 7.34                             | 7.09                             | 0.293             |
| <i>FCHO1</i>   | 6.77                           | 6.90                           | 6.65                           | 6.42                             | 6.75                             | 6.67                             | 0.267             |
| <i>MAP1S</i>   | 10.71                          | 10.32                          | 10.30                          | 9.81                             | 9.88                             | 9.71                             | 1.01E-02          |
| <i>HIATL1</i>  | 10.41                          | 10.42                          | 10.37                          | 8.24                             | 8.31                             | 8.24                             | 1.83E-07          |

**Note:** The P values were calculated by using the Student's t test.
