# Supplementary material for: Integrative genomics analysis identifies promising SNPs and genes implicated in tuberculosis risk based on multiple omics datasets
Source: Aging (Albany NY). 2020 Oct 13;12(19):19173–220. doi: 10.18632/aging.103744 (PMC7732298; doi:10.18632/aging.103744)
Supplement: Supplementary Table 19 [file aging-12-103744-s012..xlsx]

## Sheet: Supplemental Table 19
	Infected	RPS23	RPS5	CLN8	SPATA20	CDC16	TMEM99	LIG3	RRM1	SCAPER	ZNF266	RCN3	CARD9	TBRG4	ZNF502	ZNF197	NUDT13	HDAC10	TDRKH	PDK1	CDK10	DHX57	NPHP4	ZNF354A	FCHO1	MAP1S	HIATL1
	RPS23	1	0.93	-0.22	0.97	0.95	0.84	0.84	1	1	0.99	0.58	0.12	0.53	0.8	0.33	0.34	0.71	0.63	1	0.92	0.13	0.63	-0.8	0.45	0.89	0.7
	RPS5	0.93	1	-0.57	0.99	1	0.58	0.98	0.93	0.9	0.96	0.84	-0.26	0.81	0.51	-0.05	0.67	0.92	0.88	0.94	0.7	-0.25	0.88	-0.52	0.08	1	0.37
	CLN8	-0.22	-0.57	1	-0.44	-0.53	0.34	-0.72	-0.22	-0.17	-0.34	-0.92	0.94	-0.94	0.42	0.85	-0.99	-0.85	-0.9	-0.26	0.18	0.94	-0.9	-0.41	0.77	-0.64	0.55
	SPATA20	0.97	0.99	-0.44	1	1	0.69	0.94	0.97	0.96	0.99	0.75	-0.11	0.72	0.63	0.1	0.55	0.85	0.8	0.98	0.8	-0.1	0.8	-0.64	0.23	0.97	0.51
	CDC16	0.95	1	-0.53	1	1	0.62	0.97	0.94	0.93	0.98	0.81	-0.21	0.78	0.55	0	0.63	0.9	0.85	0.96	0.74	-0.2	0.85	-0.56	0.13	0.99	0.42
	TMEM99	0.84	0.58	0.34	0.69	0.62	1	0.41	0.84	0.87	0.77	0.05	0.64	0	1	0.79	-0.22	0.22	0.12	0.82	0.99	0.64	0.12	-1	0.86	0.51	0.97
	LIG3	0.84	0.98	-0.72	0.94	0.97	0.41	1	0.84	0.81	0.9	0.93	-0.44	0.91	0.33	-0.24	0.8	0.98	0.95	0.86	0.56	-0.43	0.95	-0.34	-0.11	0.99	0.19
	RRM1	1	0.93	-0.22	0.97	0.94	0.84	0.84	1	1	0.99	0.58	0.13	0.53	0.8	0.33	0.34	0.71	0.63	1	0.92	0.13	0.63	-0.8	0.45	0.89	0.7
	SCAPER	1	0.9	-0.17	0.96	0.93	0.87	0.81	1	1	0.98	0.53	0.18	0.49	0.83	0.38	0.29	0.67	0.59	1	0.94	0.18	0.59	-0.83	0.5	0.87	0.73
	ZNF266	0.99	0.96	-0.34	0.99	0.98	0.77	0.9	0.99	0.98	1	0.67	0	0.63	0.72	0.21	0.45	0.79	0.72	1	0.87	0.01	0.72	-0.72	0.34	0.94	0.6
	RCN3	0.58	0.84	-0.92	0.75	0.81	0.05	0.93	0.58	0.53	0.67	1	-0.74	1	-0.03	-0.58	0.96	0.99	1	0.61	0.21	-0.73	1	0.02	-0.47	0.89	-0.18
	CARD9	0.12	-0.26	0.94	-0.11	-0.21	0.64	-0.44	0.13	0.18	0	-0.74	1	-0.77	0.7	0.98	-0.89	-0.61	-0.69	0.08	0.5	1	-0.69	-0.69	0.94	-0.34	0.8
	TBRG4	0.53	0.81	-0.94	0.72	0.78	0	0.91	0.53	0.49	0.63	1	-0.77	1	-0.09	-0.62	0.98	0.98	0.99	0.57	0.16	-0.77	0.99	0.08	-0.51	0.86	-0.23
	ZNF502	0.8	0.51	0.42	0.63	0.55	1	0.33	0.8	0.83	0.72	-0.03	0.7	-0.09	1	0.84	-0.3	0.13	0.03	0.77	0.97	0.7	0.03	-1	0.9	0.44	0.99
	ZNF197	0.33	-0.05	0.85	0.1	0	0.79	-0.24	0.33	0.38	0.21	-0.58	0.98	-0.62	0.84	1	-0.78	-0.43	-0.52	0.29	0.67	0.98	-0.52	-0.83	0.99	-0.13	0.91
	NUDT13	0.34	0.67	-0.99	0.55	0.63	-0.22	0.8	0.34	0.29	0.45	0.96	-0.89	0.98	-0.3	-0.78	1	0.9	0.94	0.38	-0.06	-0.89	0.94	0.29	-0.69	0.73	-0.44
	HDAC10	0.71	0.92	-0.85	0.85	0.9	0.22	0.98	0.71	0.67	0.79	0.99	-0.61	0.98	0.13	-0.43	0.9	1	0.99	0.74	0.37	-0.61	0.99	-0.14	-0.31	0.95	-0.02
	TDRKH	0.63	0.88	-0.9	0.8	0.85	0.12	0.95	0.63	0.59	0.72	1	-0.69	0.99	0.03	-0.52	0.94	0.99	1	0.66	0.28	-0.69	1	-0.04	-0.41	0.91	-0.12
	PDK1	1	0.94	-0.26	0.98	0.96	0.82	0.86	1	1	1	0.61	0.08	0.57	0.77	0.29	0.38	0.74	0.66	1	0.9	0.09	0.67	-0.77	0.41	0.91	0.66
	CDK10	0.92	0.7	0.18	0.8	0.74	0.99	0.56	0.92	0.94	0.87	0.21	0.5	0.16	0.97	0.67	-0.06	0.37	0.28	0.9	1	0.51	0.28	-0.97	0.76	0.64	0.92
	DHX57	0.13	-0.25	0.94	-0.1	-0.2	0.64	-0.43	0.13	0.18	0.01	-0.73	1	-0.77	0.7	0.98	-0.89	-0.61	-0.69	0.09	0.51	1	-0.69	-0.7	0.94	-0.33	0.8
	NPHP4	0.63	0.88	-0.9	0.8	0.85	0.12	0.95	0.63	0.59	0.72	1	-0.69	0.99	0.03	-0.52	0.94	0.99	1	0.67	0.28	-0.69	1	-0.04	-0.41	0.91	-0.12
	ZNF354A	-0.8	-0.52	-0.41	-0.64	-0.56	-1	-0.34	-0.8	-0.83	-0.72	0.02	-0.69	0.08	-1	-0.83	0.29	-0.14	-0.04	-0.77	-0.97	-0.7	-0.04	1	-0.89	-0.44	-0.99
	FCHO1	0.45	0.08	0.77	0.23	0.13	0.86	-0.11	0.45	0.5	0.34	-0.47	0.94	-0.51	0.9	0.99	-0.69	-0.31	-0.41	0.41	0.76	0.94	-0.41	-0.89	1	0	0.95
	MAP1S	0.89	1	-0.64	0.97	0.99	0.51	0.99	0.89	0.87	0.94	0.89	-0.34	0.86	0.44	-0.13	0.73	0.95	0.91	0.91	0.64	-0.33	0.91	-0.44	0	1	0.3
	HIATL1	0.7	0.37	0.55	0.51	0.42	0.97	0.19	0.7	0.73	0.6	-0.18	0.8	-0.23	0.99	0.91	-0.44	-0.02	-0.12	0.66	0.92	0.8	-0.12	-0.99	0.95	0.3	1
